# Supplementary material for: Engineering bidirectional CMC-foam-supported HKUST-1@graphdiyne with enhanced heat/mass transfer for the highly efficient adsorption and regeneration of acetaldehyde
Source: Royal Society of Chemistry journal article supplement (doi:10.1039/d0ta09780b), 2020-12-22
Supplement: d0ta09780b1.pdf [file d0ta09780b1.pdf]

## Supplementary Information

### **Engineering bidirectional CMC-foam-supported HKUST-1@graphdiyne with enhanced heat/mass transfer for the highly efficient adsorption and regeneration of acetaldehyde**

Hanzhuo Zhang<sup>‡a</sup>, Yaseen Muhammad<sup>‡b</sup>, Xinfang Cui<sup>‡a</sup>, Zhengsheng Zhang<sup>a</sup>, Long  
Liu<sup>a</sup>, Zhe Chu<sup>a</sup>, Jing Li<sup>a</sup>, Yanjuan Zhang<sup>a</sup>, Syed Jalil Shah<sup>a</sup>, Zhenxia Zhao<sup>\*a</sup>

<sup>a</sup> MOE Key Laboratory of New Processing Technology for Nonferrous Metals and Materials,  
Guangxi Key Laboratory of Processing for Non-ferrous Metals and Featured Materials, School of  
Chemistry and Chemical Engineering, Guangxi University, Nanning 530004, China,  
[zhaozhenxia@gxu.edu.cn](mailto:zhaozhenxia@gxu.edu.cn)

<sup>b</sup> Institute of Chemical Sciences, University of Peshawar, 25120, KP, Pakistan

\* To whom correspondence should be addressed. E-mail address: [zhaozhenxia@gxu.edu.cn](mailto:zhaozhenxia@gxu.edu.cn)

<sup>‡</sup> These authors contributed equally to this work

## Experimental

### Thermal diffusion experiment

The original HKUST-1 and HK@GDY/CMC-B were pressed into thin sheets and heated at 35 °C for heat preservation for 20 min. Then, they were quickly placed in 10 °C cold source to measure and photograph the thermal diffusion using infrared camera. The cooling rate coefficient ( $k$ ) was obtained according to Eq. S(1).

$$\ln \frac{T_t - T_m}{T_0 - T_m} = kt + c \quad (1)$$

### Acetaldehyde adsorption experiments and kinetics

The equilibrium adsorption of acetaldehyde was performed gravimetrically in TGA/DSC+ system (METTLER TOLEDO). In this system, an ultrasensitive microbalance of 0.1 µg resolution was mounted in the thermostat heatsink with high precision temperature control. Each sample was degassed at 353 K for 12 h. The measurements were carried out at 298 K for the determination of adsorption of vapor. Each sample was placed in a closed container. Each sample was placed in a closed container. Before this sample was put in, the closed container was swept with nitrogen for 20 minutes. Then, a quantitative concentration of acetaldehyde gas was injected into this container. After the adsorption equilibrium was reached, it was quickly transferred to the TGA/DSC+ instrument for the determination of mass. The equilibrium adsorption amount ( $Q_e$ , mmol/g) of acetaldehyde was calculated using Eq. S(2).

$$Q_e = \frac{W_e - W_a}{W_a M_a} \times 1000 \quad (2)$$

Where  $M_a$  (g/mol) is the molecular weight;  $W_a$  (g) is the initial weight of adsorbent and  $Q_e$  (mmol/g) is the adsorbed amount per gram at equilibrium.

The adsorption kinetics of acetaldehyde was tested by photoacoustic multi-gas analyser (GASERA ONE). 0.05 g of adsorbent was pre-placed in a sealed quartz tank reactor (400 mL) at 298 K, and the gaseous acetaldehyde (7.8 mg/m<sup>3</sup>, 99% purity) was added to the reactor. Acetaldehyde concentrations in the reactor were detected at an interval of three minutes. Instantaneous adsorption was calculated using Eq. S(3).

$$Q_t = \frac{(C_0 - C_t) V_0}{W_a} \times 1000 \quad (3)$$

Where  $W_a$  (g) is the initial weight of adsorbent and  $Q_t$  (mmol/g) is the transient adsorption uptake per gram of adsorbent at time  $t$  (min).

The adsorption kinetics of acetaldehyde was fitted by general diffusion model and the diffusion coefficient ( $k_d$ ) was calculated using Eq. S(4).

$$\frac{Q_t}{Q_e} = k_d \sqrt{t} + c \quad (4)$$

Where  $Q_e$  (mmol/g) and  $Q_t$  (mmol/g) represent the adsorbed amount per gram of the adsorbent at equilibrium and the transient adsorption uptakes per gram at time  $t$  (min), respectively.

### Temperature programmed desorption (TPD) experiments

TPD experiment was performed on a TGA/DSC+ (METTLER TOLEDO). Various HKUST-1 samples were pre-activated at 353 K under vacuum overnight, and then quickly transferred into a desiccator containing a given dehydrated acetaldehyde ( $C_0=7.8$  mg/m<sup>3</sup>). Adsorption experiments were conducted at 298 K and ambient pressure for 60 min. HKUST-1 samples adsorbed acetaldehyde were immediately placed in a small crucible. The heating program started from 313 to 443 K under high purity N<sub>2</sub> atmosphere at a flow rate of 40 mL/min and heating rate of

10 K/min while the acetaldehyde desorption were detected using TGA. Desorption kinetics of acetaldehyde was fitted by Pseudo-first-order kinetic model and desorption diffusion coefficient ( $k_{ds}$ ) was obtained according to Eq. S(5).

$$\ln \frac{Q_{ds}}{Q_e} = k_{ds}t + c \quad (5)$$

Where  $Q_e$  (mmol/g) shows the adsorbed amount per gram of the adsorbent at equilibrium and  $Q_{ds}$  (mmol/g) is the transient desorption amount per gram at time  $t$  (min).

### Characterization and instrumentation

The prepared HKUST-1 composites were characterized using scanning electron microscope (SEM, SU8020). Prior to analysis, each sample was gold coated under high vacuum. Powder X-ray diffraction (PXRD) data were recorded from  $5^\circ$  to  $50^\circ$  at a scanning rate of  $0.03^\circ/\text{min}$  (SMARTLAB3KW, Japan). Fourier transform infrared (FT-IR) spectrometry was performed on a Bruker Vector instrument, and data were collected in wavenumber range of  $400\text{-}4000\text{ cm}^{-1}$ . Thermogravimetric analysis (TGA) were performed on a METTLER TOLEDO (TGA/DSC3+) instrument in a temperature range of  $363\text{-}843\text{ K}$  under  $10\text{ K/min}$  under dry  $\text{N}_2$  atmosphere. X-ray photoelectron spectroscopy (XPS) tests were monitored by Escalab 250Xi X-ray photoelectron spectrometer (Thermo Fisher, USA). The pore textural properties of the prepared composites were analyzed through  $\text{N}_2$  adsorption-desorption isotherms using a surface area analyzer (ASAP-2460, Micromeritics). Before each adsorption experiment, the samples were dried under vacuum at  $353\text{ K}$  for  $10\text{ h}$  and a vacuum of  $< 0.05\text{ Pa}$ . Thermal conductivity was measured by Hot Disk TPS 2500S instrument (Hot Disk AB, Sweden).

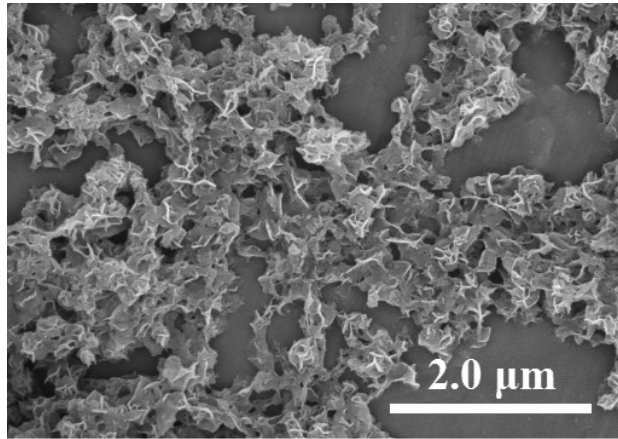

**Fig. S1** SEM image of GDY

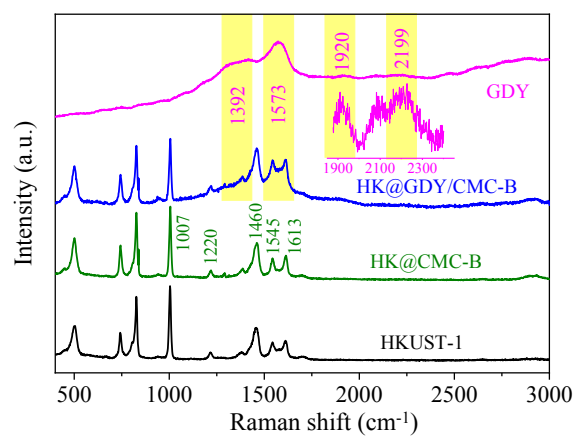

**Fig. S2** Raman spectrum of GDY, HKUST-1, HK@CMC-B and HK@GDY/CMC-B

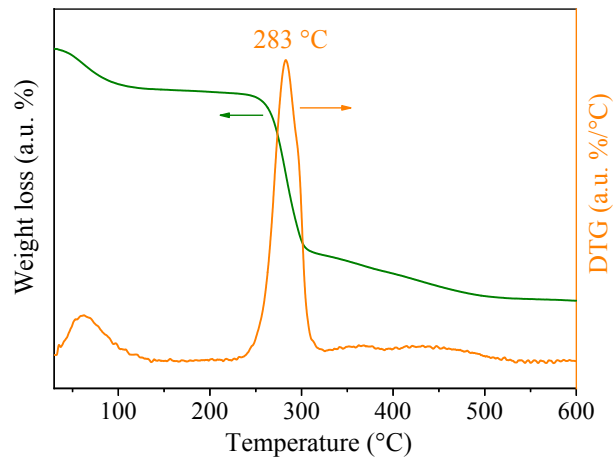

**Fig. S3** TG and DTG curves of CMC

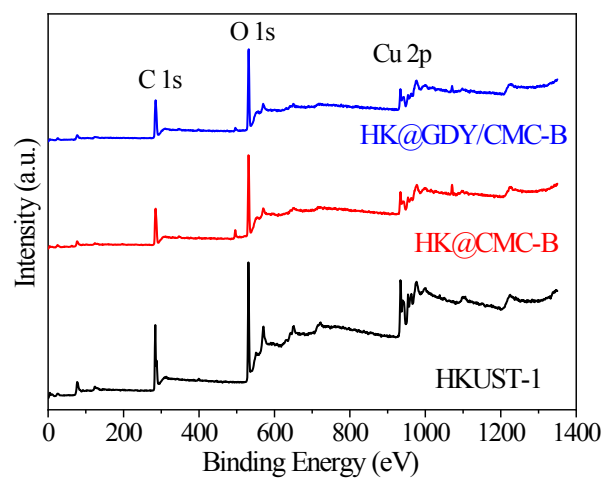

**Fig. S4** XPS survey spectra of HKUST-1, HK@CMC-B foam, and HK@GDY/CMC-B foam

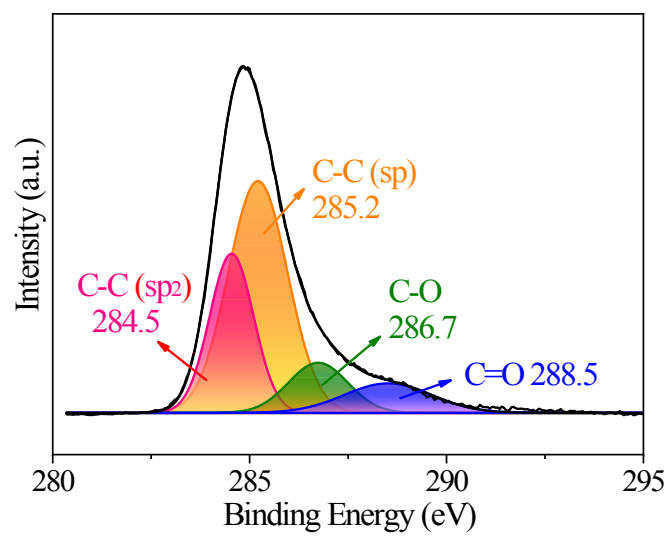

**Fig. S5** High resolution XPS spectrum of C 1s in GDY



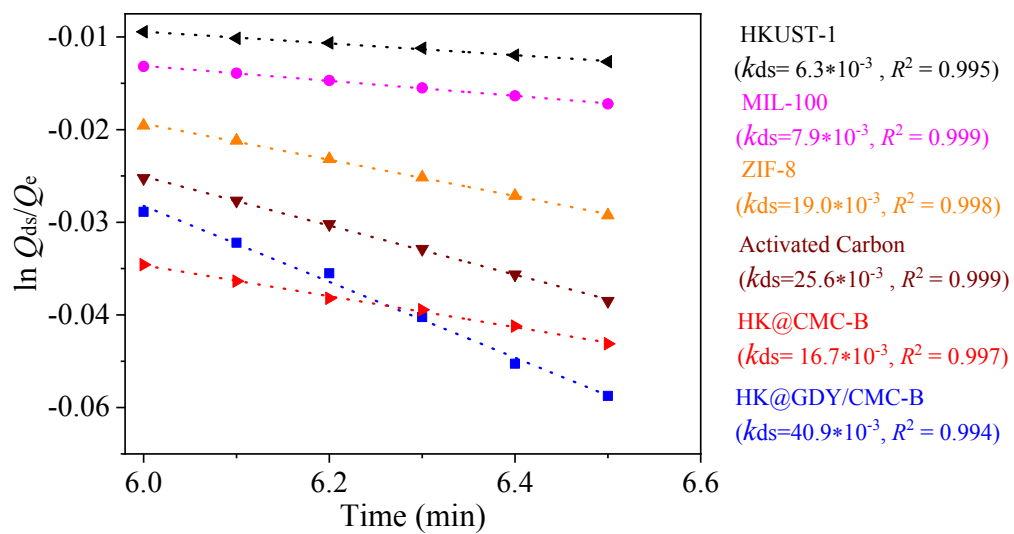

**Fig. S6** Pseudo-first-order kinetic simulated desorption results on HKUST-1, HK@CMC-B foam, HK@GDY/CMC-B foam and other common adsorbents

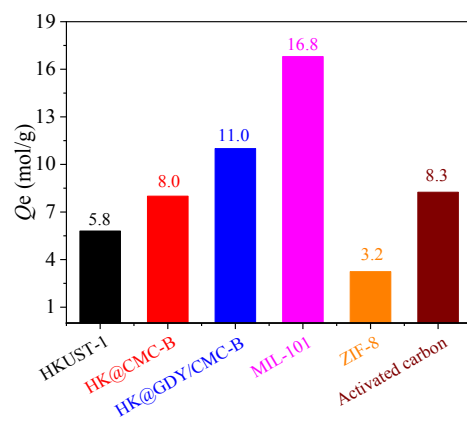

**Fig. S7** Equilibrium adsorption ( $Q_e$ ) on HKUST-1, HK@CMC-B foam, HK@GDY/CMC-B foam and other common adsorbents

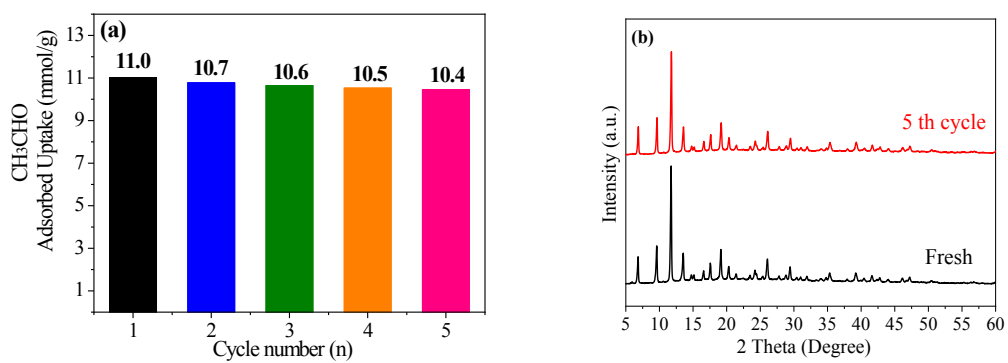

**Fig. S8** HK@GDY/CMC-B continuous cyclic adsorption (a) of acetaldehyde at 303 K; XRD (b) after 5<sup>th</sup> cycle.

**Table S1** BET parameters of reported MOF foams.

| Sample                    | $S_{\text{BET}}$<br>(m <sup>2</sup> /g) | Reference |
|---------------------------|-----------------------------------------|-----------|
| UiO-66/cellulose          | 826                                     | S1        |
| COF-IL@chitosan           | 103                                     | S2        |
| GA-UiO-66-NH <sub>2</sub> | 707                                     | S3        |
| 3D rGO / ZIF-67           | 491                                     | S4        |
| CNFS-ZIF-8                | 273                                     | S5        |
| HK@GDY/CMC-B              | 945                                     | This work |

**Table S2** Pore structure parameters of HKUST-1, HK@CMC-R foam, HK@CMC-B foam, and HK@GDY/CMC-B foam.

| Sample       | $S_{\text{Langmuir}}$<br>( $\text{m}^2/\text{g}$ ) | $S_{\text{BET}}$<br>( $\text{m}^2/\text{g}$ ) | $S_{\text{micro}}^*$<br>( $\text{m}^2/\text{g}$ ) | $S_{\text{meso}}$<br>( $\text{m}^2/\text{g}$ ) | $V_{\text{t}}^*$<br>( $\text{cm}^3/\text{g}$ ) | $V_{\text{micro}}^*$<br>( $\text{cm}^3/\text{g}$ ) |
|--------------|----------------------------------------------------|-----------------------------------------------|---------------------------------------------------|------------------------------------------------|------------------------------------------------|----------------------------------------------------|
| HKUST-1      | 953.0                                              | 823.9                                         | 736.5                                             | 87.4                                           | 0.43                                           | 0.28                                               |
| HK@CMC-R     | 1035.5                                             | 930.7                                         | 825.3                                             | 105.4                                          | 0.43                                           | 0.31                                               |
| HK@CMC-B     | 1136.5                                             | 960.2                                         | 854.1                                             | 106.1                                          | 0.45                                           | 0.32                                               |
| HK@GDY/CMC-B | 1113.8                                             | 945.1                                         | 807.9                                             | 137.2                                          | 0.42                                           | 0.30                                               |

$S_{\text{micro}}$ : surface area supplied from micropores (<2.0 nm);

$V_{\text{t}}$  and  $V_{\text{micro}}$ : total pore volume and pore volume supplied from micropores (< 2.0 nm).

**Table S3** Distribution of surface element (C, O and Cu) of HKUST-1, HK@CMC-B and HK@GDY/CMC-B determined from XPS.

| Sample       | Atomic content (%) |       |      |
|--------------|--------------------|-------|------|
|              | C                  | O     | Cu   |
| HKUST-1      | 57.97              | 33.91 | 8.13 |
| HK@CMC-B     | 57.36              | 38.45 | 4.19 |
| HK@GDY/CMC-B | 58.60              | 37.34 | 4.06 |

**Table S4** Binding energy of peaks separated from C 1s XPS spectra of HKUST-1, HK@CMC-B, HK@GDY/CMC-B, and GDY.

| Sample       | Binding Energy (eV)   |           |            |         |
|--------------|-----------------------|-----------|------------|---------|
|              | C-C(sp <sup>2</sup> ) | C-O-C/C-O | -O-C=O/C=O | C-C(sp) |
| HKUST-1      | 284.8                 | -         | 288.6      | -       |
| HK@CMC-B     | 284.8                 | 286.4     | 288.2      | -       |
| HK@GDY/CMC-B | 284.8                 | 286.4     | 288.0      | 285.5   |
| GDY          | 284.5                 | 286.7     | 288.5      | 285.2   |

## References

- S1 H. Babaei, A. J. H. Mc Gaughey and C. E. Wilmer, *Chem. Sci.*, 2017, 8, 583-589.
- S2 Z. Wang, L. Song, Y. Wang, X. Zhang, D. Hao, Y. Feng and J. Yao, *Chem. Eng. J.*, 2019, 371, 138-144.
- S3 L. Ding, B. Yao, F. Li, S. Shi, N. Huang, H. Yin, Q. Guan and Y. Dong, *J. M. Chem. A.*, 2019, 7, 4689-4698.
- S4 M. Lu, Y. Deng, Y. Luo, J. Lv, T. Li, J. Xu, S. Chen and J. Wang, *Anal. Chem.*, 2019, 91, 888-895.
- S5 L. Zhu, L. Zong, X. Wu, M. Li, H. Wang, J. You and C. Li, *ACS Nano*, 2018, 12, 4462-4468.
